# Supplementary material for: Learning from a large-scale calibration effort of multiple lake temperature models
Source: Copernicus journal article supplement (doi:10.5194/hess-29-1183-2025), 2025-03-03
Supplement: Supplementary file 1 [file hess-29-1183-2025-supplement.pdf]

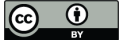

*Supplement of*

## **Learning from a large-scale calibration effort of multiple lake temperature models**

**Johannes Feldbauer et al.**

*Correspondence to:* Johannes Feldbauer ([johannes.feldbauer@tu-dresden.de](mailto:johannes.feldbauer@tu-dresden.de)) and Jorrit P. Mesman ([jorrit.mesman@ebc.uu.se](mailto:jorrit.mesman@ebc.uu.se))

The copyright of individual parts of the supplement might differ from the article licence.

# S1 Additional material

## S1.1 Additional Plots

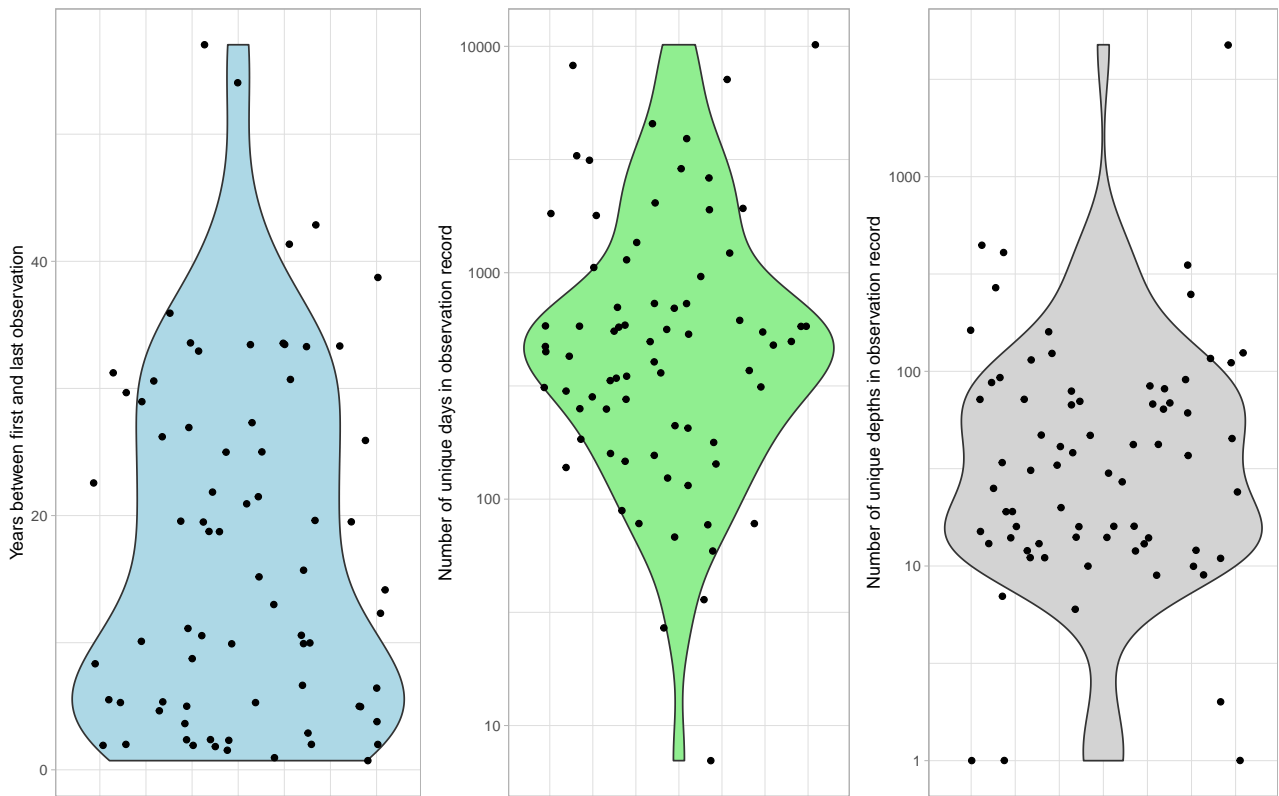

Figure S1: Violin plots showing the distribution of duration of observed data (left, calculated as years between first and last observation), Number of unique days in observation (middle), and number of unique depths in observations (right). The very high number of unique depths in observation records are caused by the fact that some of the observational data were from CTD profiles, which we aggregated to a vertical resolution of 0.1 m.

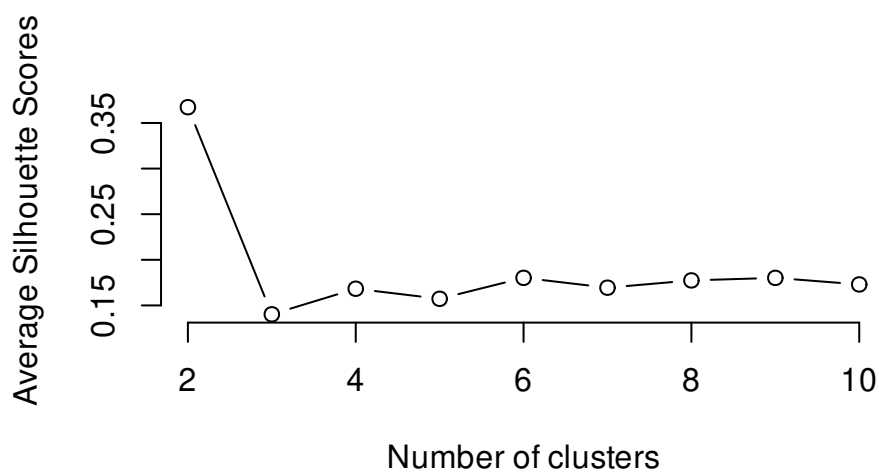

Figure S2: Silhouette plot of the cluster analysis. A larger silhouette score indicates that the clusters are well distinguishable.

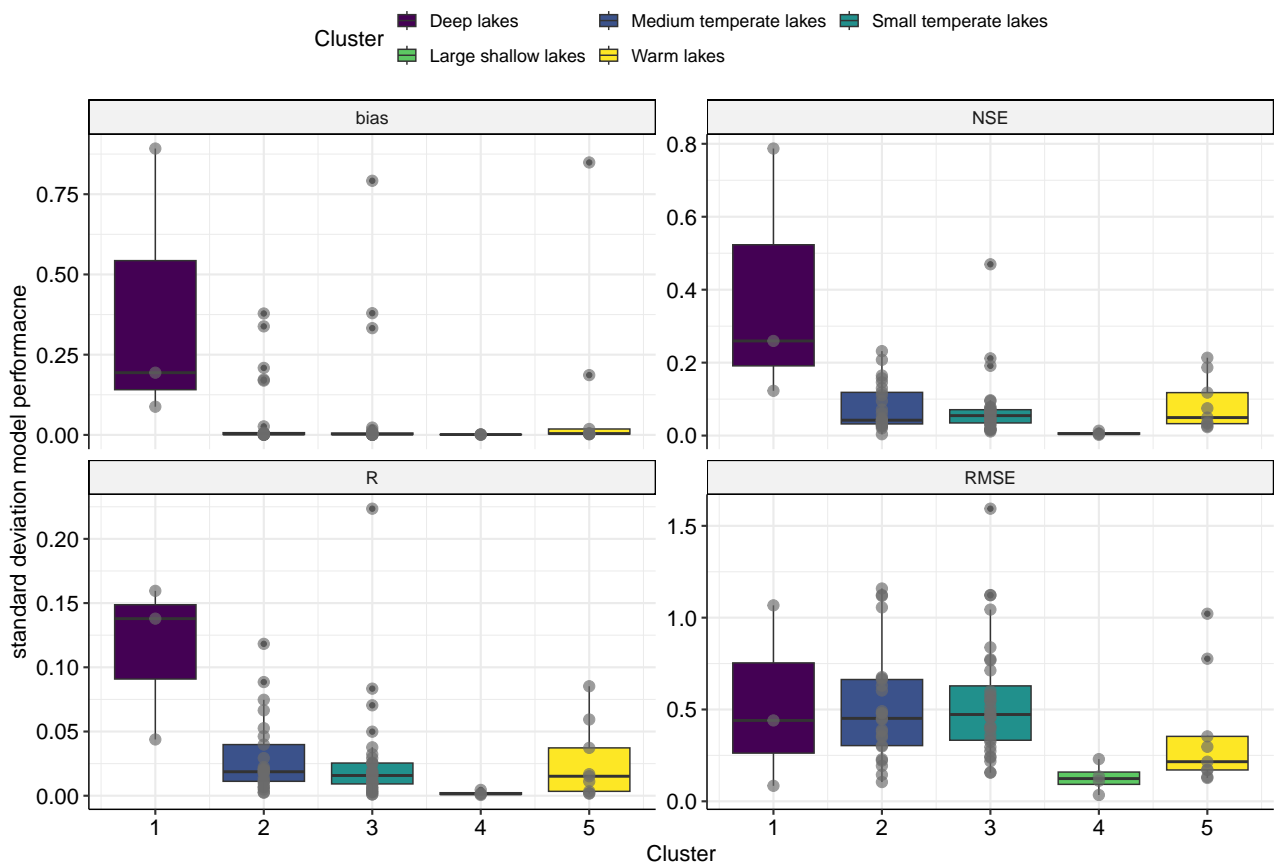

Figure S3: Boxplots of absolute difference between best and worst performing model per lake for the different metrics and lake clusters. The grey points indicate values for individual lakes.

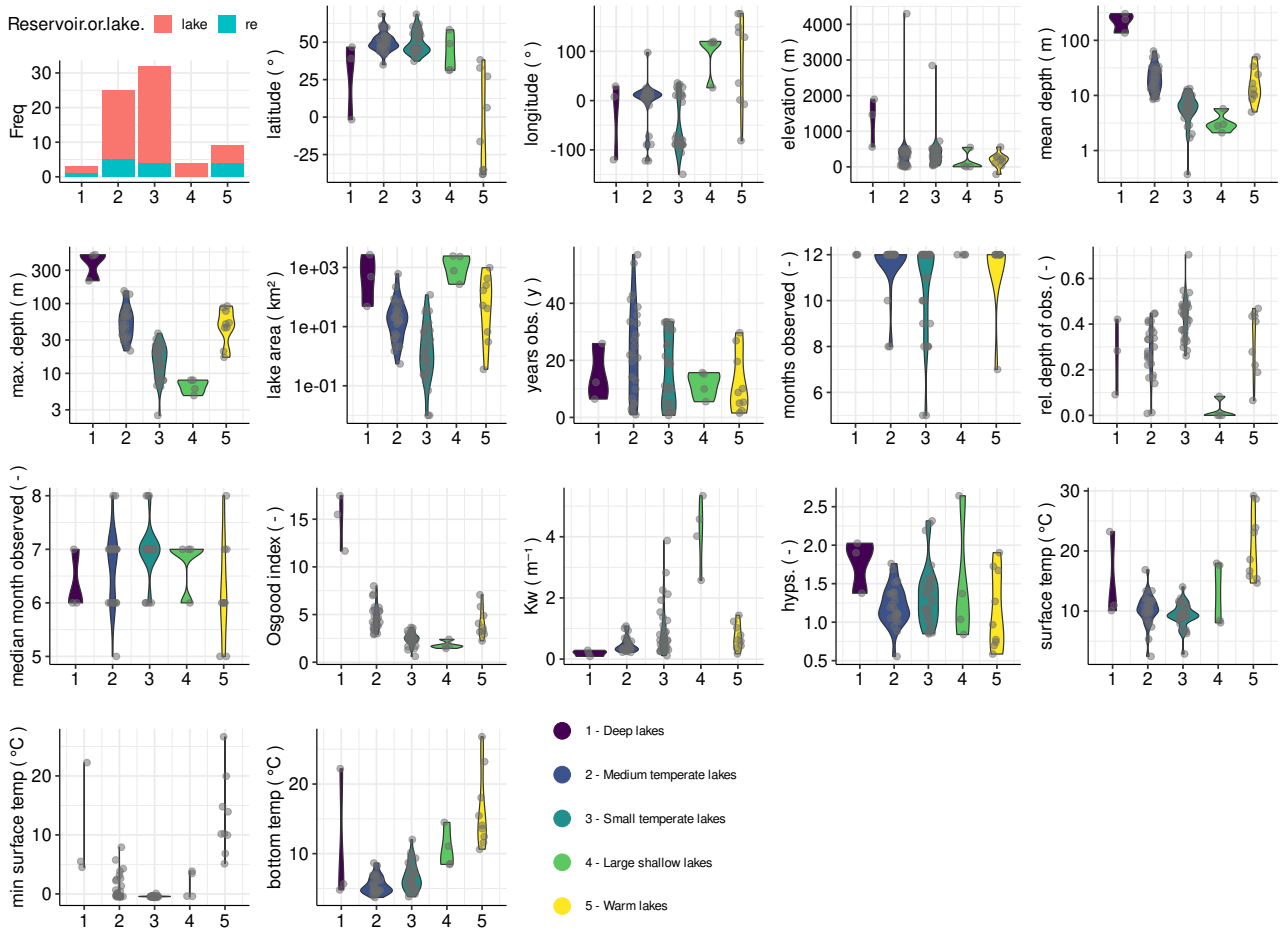

Figure S4: Distribution of lake characteristics for the clusters derived by K-means clustering. The grey points indicate values for individual lakes.

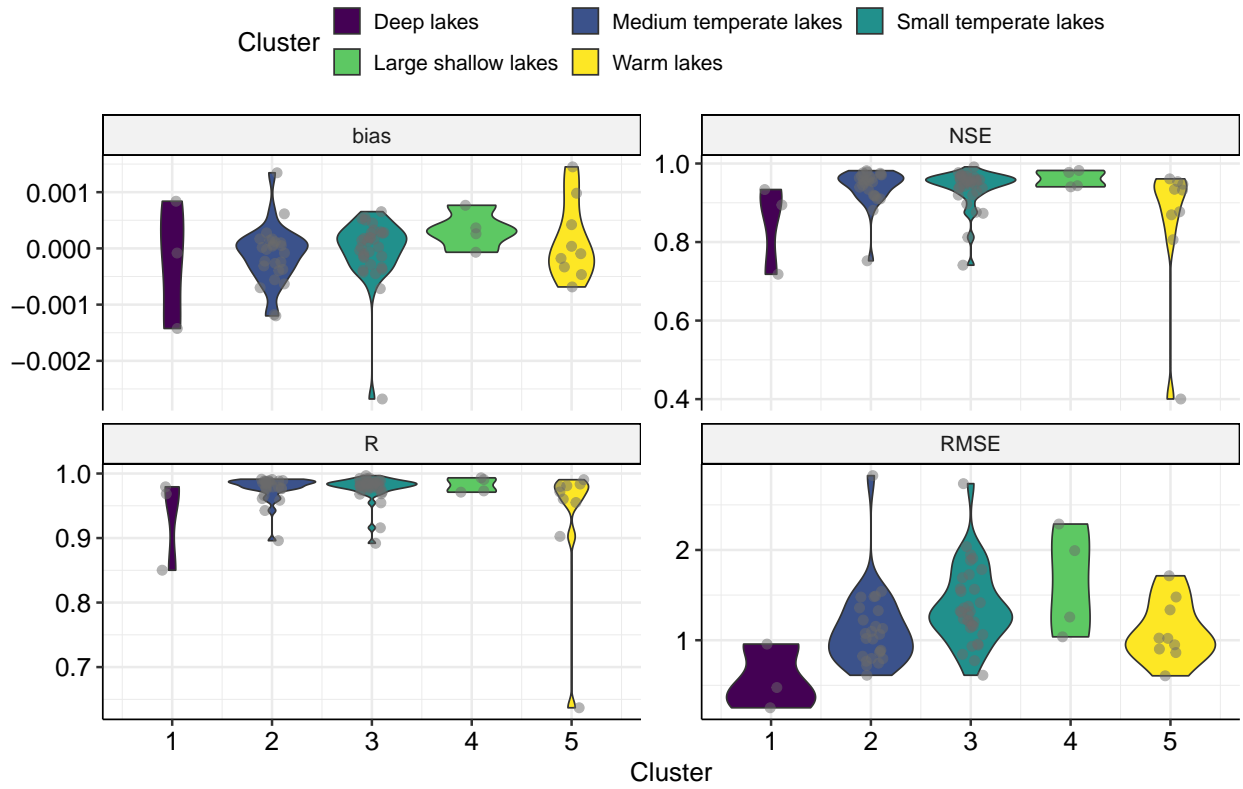

Figure S5: Violin plots of model performance of the best-performing model in each lake, split by lake clusters and performance metric. The grey points indicate values for individual lakes.

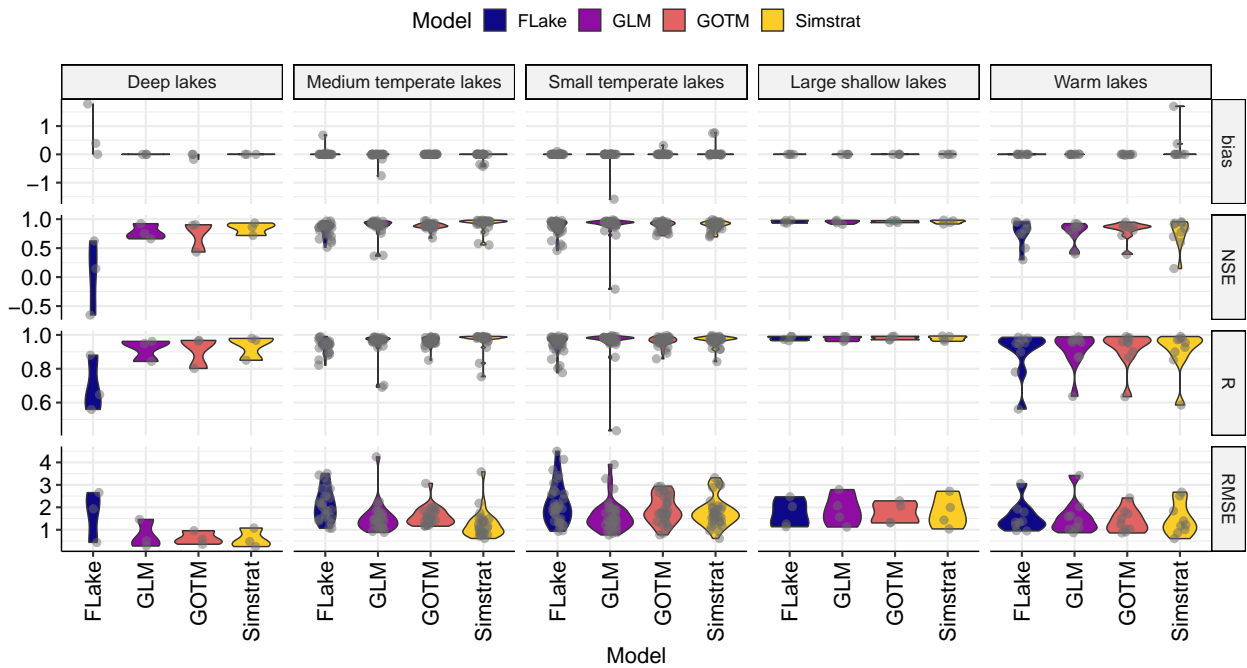

Figure S6: Violin plots of the performance metrics for best performing parameter sets per lake for each model, lake clusters, and performance metric.

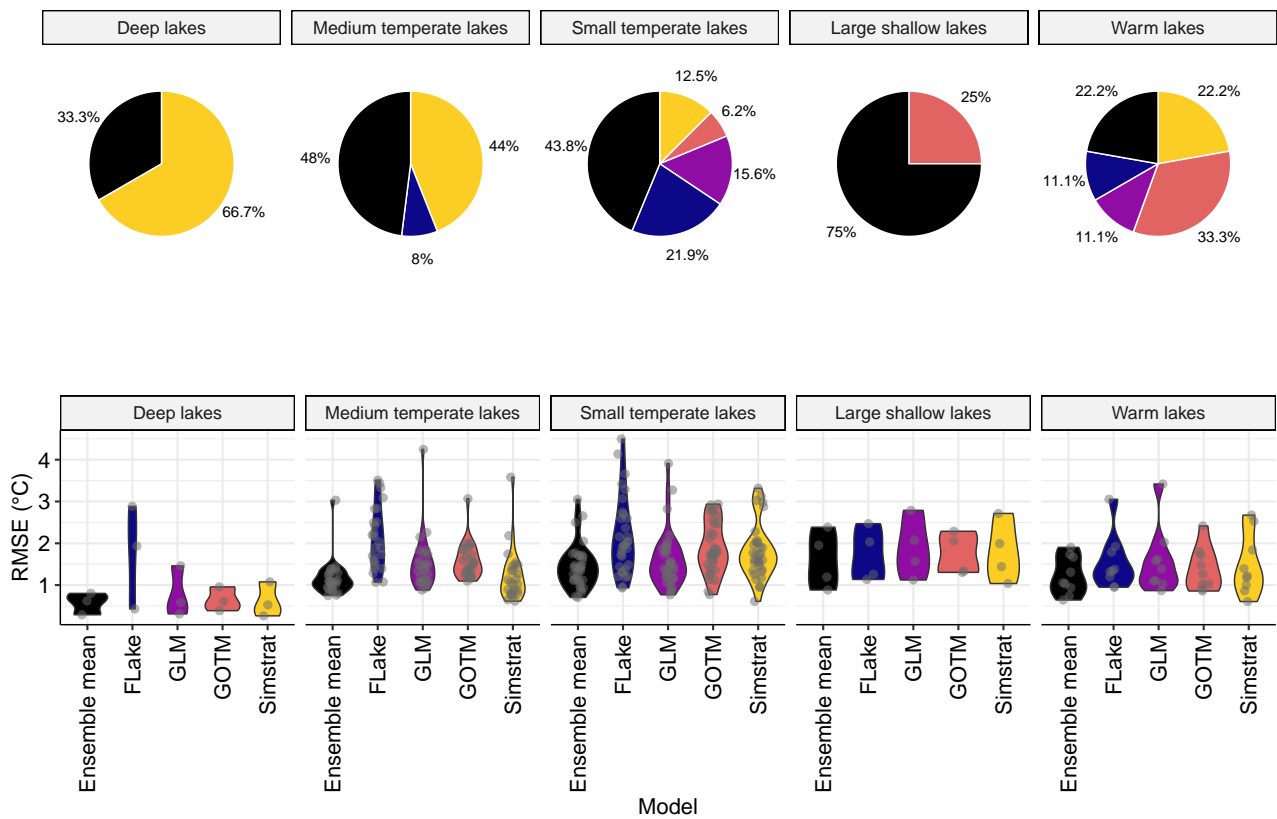

Figure S7: Percentage of lakes where each model performs best in terms of root mean squared error (RMSE), split to the lake clusters and including the ensemble mean as its own predictor (top, color refers to model or ensemble mean). Distribution of best performing parameter set (RMSE) per lake model or ensemble mean and lake clusters (below).

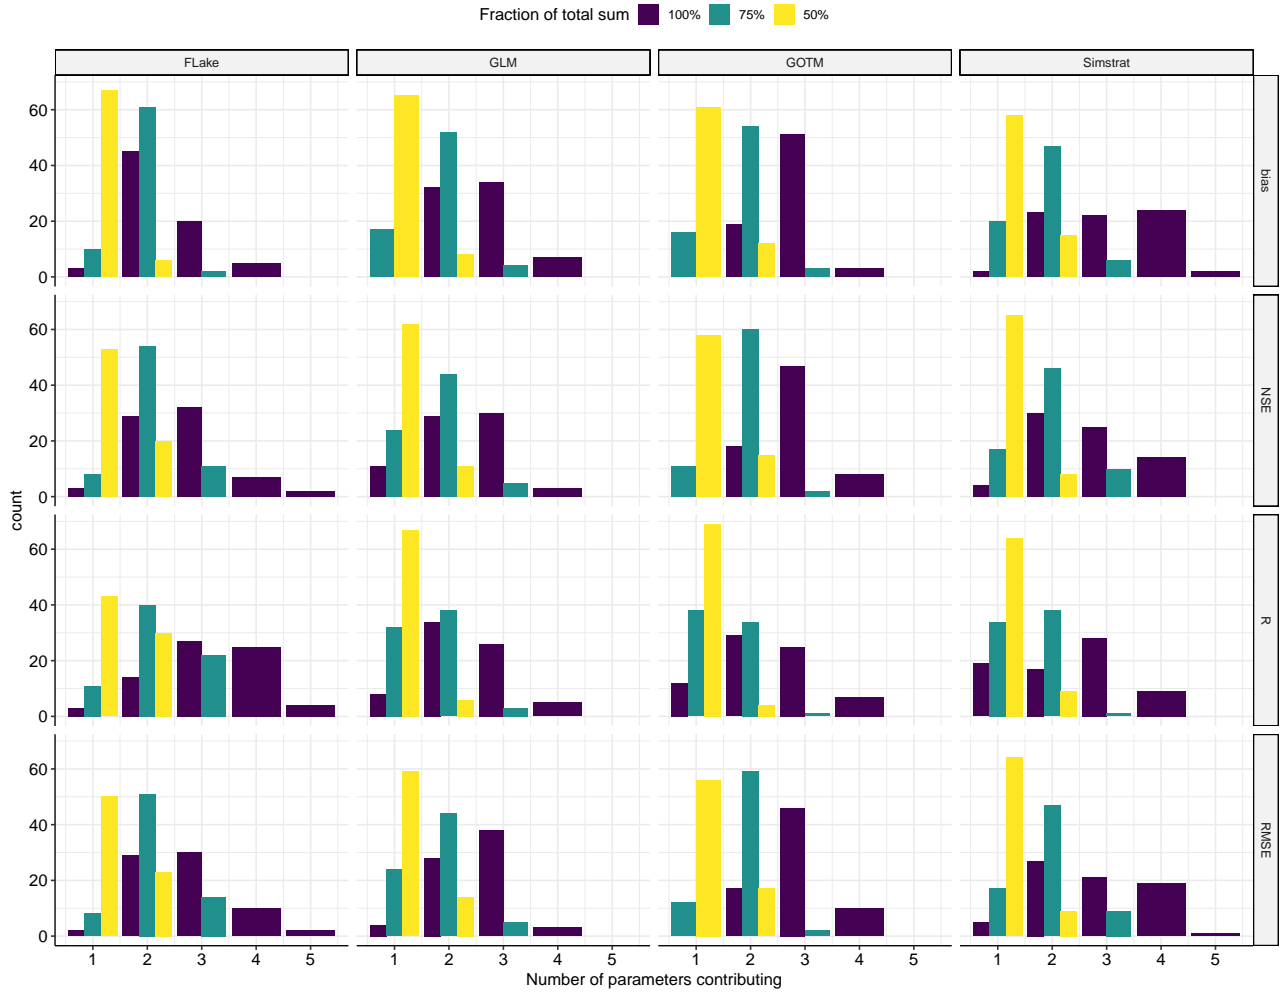

Figure S8: Distribution of the number of parameters that contribute to different fractions of the total sum of sensitivity measure value for each model and performance metric. For example, one contributing parameter for a fraction of 50% means that only one parameter contributes with at least 50% to the sum of all estimated sensitivity measures.

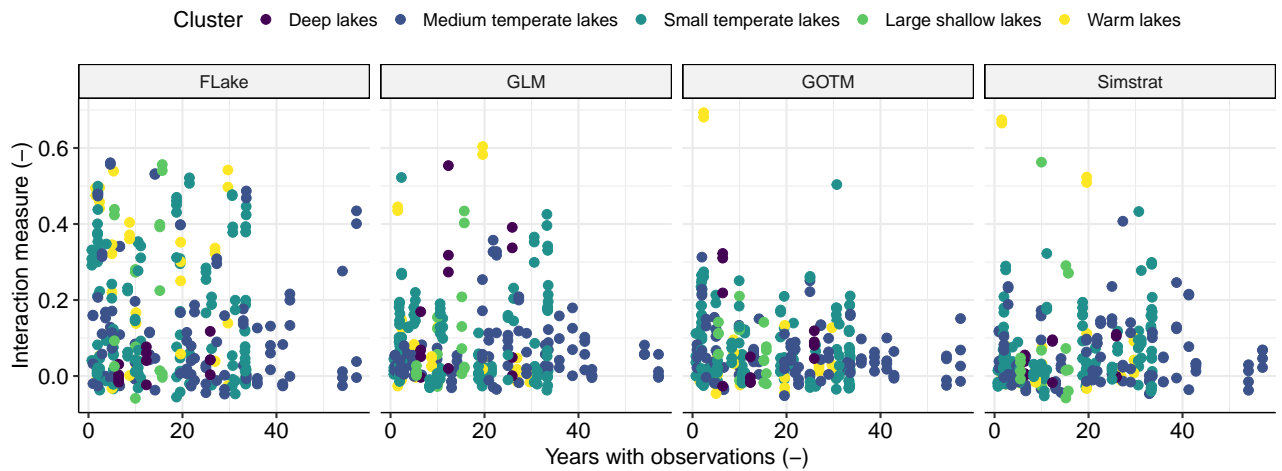

Figure S9: Interaction measure plotted against number of years with observed water temperature for the four models and lake clusters.

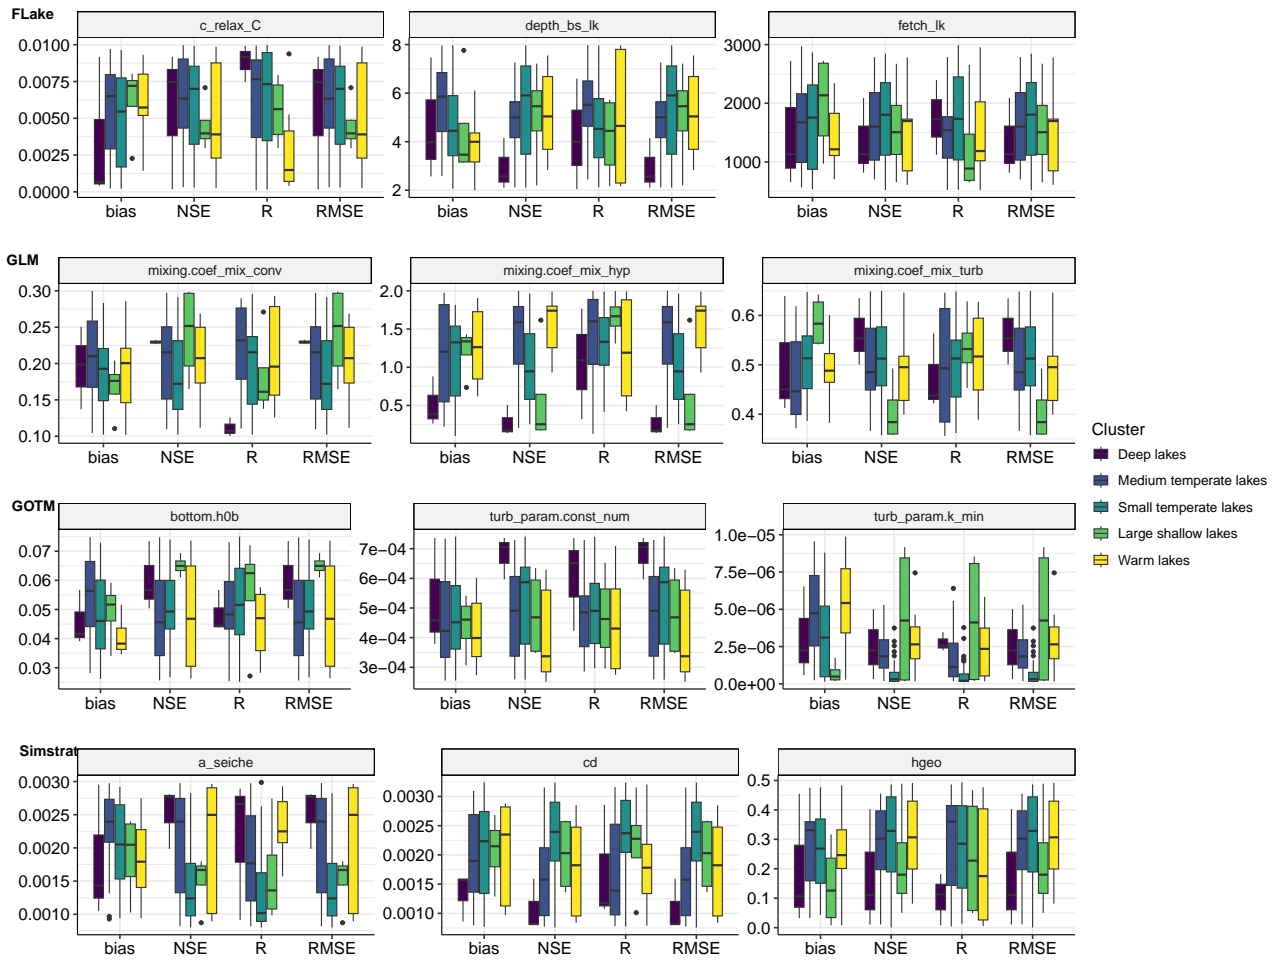

Figure S10: Boxplot of model specific parameters of the best performing parameter set for the different performance measures and lake clusters.



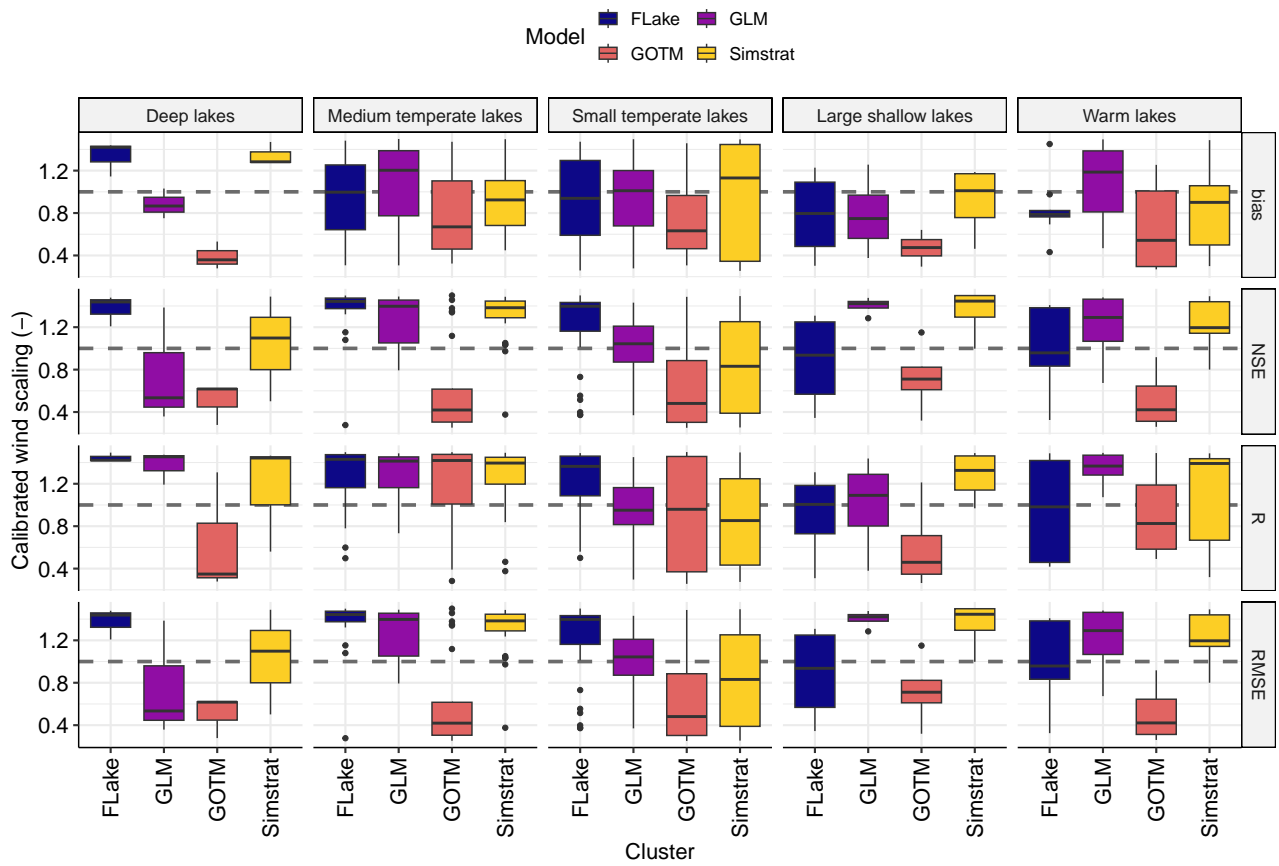

Figure S11: Boxplot of the calibrated wind speed scaling factors for the different models, clusters and based on which performance metric was chosen to optimize.

## S1.2 Additional Tables

**Table S1.** Overview of the simulated lakes and their characteristics.

| Lake Name               | Country         | Latitude (°) | Longitude (°) | Elevation (m) | Mean depth (m) | Max depth (m) | Lake area (km <sup>2</sup> ) | Secchi disk depth (m) | Light extinction (m <sup>-1</sup> ) | Lake cluster     |
|-------------------------|-----------------|--------------|---------------|---------------|----------------|---------------|------------------------------|-----------------------|-------------------------------------|------------------|
| Allequash Lake          | USA             | 46.04        | -89.62        | 494           | 2.9            | 8             | 1.64                         | 3.2                   |                                     | Small temperate  |
| Alqueva Reservoir       | Portugal        | 38.2         | -7.49         | 152           | 16.6           | 92            | 250                          | 3.15                  | 0.69                                | Warm             |
| Lake Annie              | USA             | 27.21        | -81.35        | 33.7          | 8.57           | 20.7          | 0.36                         |                       |                                     | Warm             |
| Lake Arendsee           | Germany         | 52.89        | 11.47         | 23            | 28.8           | 49            | 5.11                         | 2.89                  |                                     | Medium temperate |
| Lake Argyle             | Australia       | -16.31       | 128.68        | 100           | 10.1           | 51            | 980                          |                       | 0.89                                | Warm             |
| Lake Biel               | Switzerland     | 47.08        | 7.16          | 429           | 30             | 74            | 39.3                         |                       | 0.51                                | Medium temperate |
| Big Muskellunge Lake    | USA             | 46.02        | -89.61        | 500           | 7.5            | 21.3          | 3.63                         | 6.6                   |                                     | Small temperate  |
| Black Oak Lake          | USA             | 46.16        | -89.32        | 521.51        | 10.36          | 25.91         | 2.28                         | 3.2                   |                                     | Small temperate  |
| Lake Bosumtwi           | Ghana           | 6.3          | 1.25          | 210           | 34             | 78            | 52                           | 1.2                   |                                     | Warm             |
| Lake Bryrup             | Denmark         | 56.02        | 9.52          | 66            | 4.6            | 9             | 0.37                         | 2.1                   |                                     | Small temperate  |
| Lake Burley Griffin     | Australia       | -35.3        | 149.07        | 556           | 5              | 17            | 6.64                         | 1.4                   |                                     | Warm             |
| Lake Chao               | China           | 31.53        | 117.53        | 4.5           | 3              | 7.98          | 780                          | 0.38                  |                                     | Large shallow    |
| Crystal Lake            | USA             | 46           | -89.61        | 501           | 10.4           | 20.4          | 0.38                         | 7.5                   |                                     | Small temperate  |
| Crystal Bog             | USA             | 46.01        | -89.61        | 501.5         | 1.7            | 2.5           | 0.01                         | 1.5                   |                                     | Small temperate  |
| Delavan Lake            | USA             | 42.61        | -88.6         | 282.55        | 7.61           | 16.46         | 6.96                         | 3.53                  |                                     | Small temperate  |
| Dickie Lake             | Canada          | 45.15        | -79.09        | 341           | 5              | 12            | 0.94                         | 3.08                  |                                     | Small temperate  |
| Eagle Lake              | Canada          | 44.68        | -76.7         | 190           | 10.1           | 31.1          | 6.65                         | 4.62                  |                                     | Small temperate  |
| Ekoln basin of Malaren  | Sweden          | 59.75        | 17.62         | 0.7           | 11.5           | 50            | 20.18                        |                       | 1.09                                | Medium temperate |
| Lake Erken              | Sweden          | 59.84        | 18.63         | 10            | 9              | 21            | 24                           | 3.83                  |                                     | Medium temperate |
| Esthwaite Water         | United Kingdom  | 54.37        | -2.99         | 65            | 6.9            | 16            | 0.96                         |                       | 0.82                                | Small temperate  |
| Falling Creek Reservoir | USA             | 37.31        | -79.84        | 507           | 4              | 9.3           | 119                          |                       | 0.87                                | Small temperate  |
| Lake Feeagh             | Ireland         | 53.9         | -9.5          | 15            | 14.5           | 44            | 3.9                          | 1.74                  | 0.98                                | Medium temperate |
| Fish Lake               | USA             | 43.29        | -89.65        | 265           | 6.6            | 18.9          | 0.8                          | 2.4                   |                                     | Small temperate  |
| Great Pond              | USA             | 44.53        | -69.89        | 81            | 6.3            | 21            | 33.83                        | 6.7                   |                                     | Small temperate  |
| Green Lake              | USA             | 43.81        | -89           | 243           | 33.55          | 72            | 29.48                        | 4.8                   |                                     | Medium temperate |
| Harp Lake               | Canada          | 45.38        | -79.13        | 327           | 13.32          | 37.5          | 0.71                         | 4.08                  |                                     | Small temperate  |
| Hassel Predam           | Germany         | 51.71        | 10.83         | 504           | 5              | 14            | 0.26                         | 2.15                  |                                     | Small temperate  |
| Lake Hulun              | China           | 49           | 117.39        | 545.6         | 5.75           | 8             | 2339                         | 0.35                  |                                     | Large shallow    |
| Kilpisjarvi             | Finland         | 69.03        | 20.77         | 473           | 20             | 57            | 37.3                         |                       | 0.3                                 | Medium temperate |
| Lake Kinneret           | Israel          | 32.82        | 35.58         | -210          | 24             | 45            | 168                          | 2.95                  | 0.51                                | Warm             |
| Lake Kivu               | Rwanda/DR Congo | -1.73        | 29.24         | 1463          | 240            | 485           | 2700                         | 5.21                  | 0.27                                | Deep             |
| Klicava Reservoir       | Czechia         | 50.07        | 13.93         | 294.6         | 13.1           | 35            | 0.55                         | 5.5                   |                                     | Medium temperate |
| Lake Kuivajarvi         | Finland         | 60.47        | 23.51         | 130           | 6.3            | 13.2          | 0.62                         |                       | 0.6                                 | Small temperate  |
| Lake Langtjern          | Norway          | 60.37        | 9.73          | 510           | 2              | 12            | 0.23                         | 1.4                   | 2.25                                | Small temperate  |
| Laramie Lake            | USA             | 40.62        | -105.84       | 2843.8        | 0.37           | 6.4           | 0.14                         | 0.6                   |                                     | Small temperate  |
| Lower Lake Zurich       | Switzerland     | 47.28        | 8.58          | 406           | 49             | 136           | 67                           |                       | 0.39                                | Medium temperate |
| Lake Mendota            | USA             | 43.1         | -89.41        | 258.5         | 12.8           | 25.3          | 39.61                        | 3                     |                                     | Small temperate  |
| Lake Monona             | USA             | 43.06        | -89.36        | 257           | 8.2            | 22.5          | 13.6                         | 2.4                   |                                     | Small temperate  |
| Mozhaysk reservoir      | Russia          | 55.59        | 35.82         | 183           | 7              | 23            | 30.7                         | 1                     |                                     | Small temperate  |
| Mt Bold                 | Australia       | -35.12       | 138.71        | 242.9         | 13             | 45.4          | 3.08                         | 1.24                  | 1.16                                | Warm             |
| Lake Muggelsee          | Germany         | 52.43        | 13.65         | 32.3          | 4.9            | 7.7           | 7.4                          | 2                     | 1.48                                | Small temperate  |
| Lake Murten             | Switzerland     | 46.93        | 7.08          | 429           | 22             | 45            | 22.8                         | 3.49                  |                                     | Medium temperate |
| Lake Neuchatel          | Switzerland     | 46.54        | 6.52          | 429           | 64             | 152           | 217                          |                       | 0.25                                | Medium temperate |
| Ngoring                 | China           | 34.9         | 97.7          | 4300          | 17.6           | 30.7          | 611                          |                       | 0.3                                 | Medium temperate |
| Lake Nohipalo Mustjaerv | Estonia         | 57.93        | 27.34         | 61            | 3.9            | 8.9           | 0.22                         | 0.46                  |                                     | Small temperate  |

|                         |                |        |         |        |       |       |       |       |      |                  |
|-------------------------|----------------|--------|---------|--------|-------|-------|-------|-------|------|------------------|
| Lake Nohipalo           | Estonia        | 57.94  | 27.35   | 62     | 6.2   | 12.5  | 0.07  | 4.52  |      | Small temperate  |
| Valgejaerv              |                |        |         |        |       |       |       |       |      |                  |
| Okauchee Lake           | USA            | 43.13  | -88.43  | 269    | 7.62  | 28.65 | 4.9   | 6.94  |      | Small temperate  |
| Lake Paaijarvi          | Finland        | 61.07  | 25.13   | 102    | 15    | 85    | 13.44 | 2.2   | 1.15 | Medium temperate |
| Rappbode Reservoir      | Germany        | 51.74  | 10.89   | 415    | 28.6  | 89    | 3.95  | 4.8   | 0.25 | Medium temperate |
| Rappbode Predam         | Germany        | 51.71  | 10.8    | 533    | 5.3   | 16    | 0.24  | 2.26  |      | Small temperate  |
| Rimov Reservoir         | Czechia        | 48.85  | 14.49   | 471.48 | 16    | 44    | 2.11  | 2.9   |      | Medium temperate |
| Lake Rotorua            | New Zealand    | -38.08 | 176.28  | 280    | 10.8  | 52.9  | 425   | 2.63  | 0.61 | Warm             |
| Lake Lake               | USA            | 47.59  | -122.1  | 9      | 17.7  | 32    | 19.8  | 5     |      | Medium temperate |
| Sammamish Sau Reservoir | Spain          | 41.97  | 2.4     | 425    | 29    | 65    | 5.8   | 2.57  | 0.84 | Medium temperate |
| Lake Scharmutzelsee     | Germany        | 52.25  | 14.05   | 38.3   | 8.8   | 29    | 12.1  | 2     |      | Medium temperate |
| Sparkling Lake          | USA            | 46.01  | -89.7   | 495    | 10.9  | 20    | 0.64  | 6.2   |      | Small temperate  |
| Lake Stechlin           | Germany        | 53.17  | 13.03   | 59.8   | 23.2  | 69.5  | 2.23  | 8.6   | 0.29 | Medium temperate |
| Lake Sunapee            | USA            | 43.23  | -72.5   | 333    | 11.4  | 34    | 16.55 | 8.5   |      | Medium temperate |
| Lake Tahoe              | USA            | 39.09  | -120.03 | 1897   | 304.8 | 501   | 490   | 19.9  |      | Deep             |
| Lake Taihu              | China          | 31.24  | 120.17  | 3.3    | 2.1   | 4.8   | 2445  | 0.3   |      | Large shallow    |
| Lake Tarawera           | New Zealand    | -38.21 | 176.43  | 300    | 50    | 87.5  | 41.3  | 8.34  | 0.18 | Warm             |
| Lake Thun               | Switzerland    | 46.7   | 7.7     | 558    | 136   | 212   | 48.3  | 8.05  |      | Deep             |
| Toolik Lake             | USA            | 68.63  | -149.6  | 720    | 7     | 25    | 1.49  | 4.6   |      | Small temperate  |
| Trout Lake              | USA            | 46.03  | -89.67  | 491.8  | 14.6  | 35.7  | 15.65 | 4.7   |      | Medium temperate |
| Trout Bog               | USA            | 46.04  | -89.69  | 495    | 5.6   | 7.9   | 0.01  | 1.1   |      | Small temperate  |
| Two Sisters Lake        | USA            | 45.77  | -89.53  | 481    | 9.14  | 19.2  | 2.91  | 17.75 |      | Small temperate  |
| Lake Vendyurskoe        | Russia         | 62.1   | 33.1    | 131    | 5.3   | 13.4  | 10.4  | 3.5   | 1.5  | Small temperate  |
| Lake Vortsjarv          | Estonia        | 58.31  | 26.01   | 33     | 2.8   | 6     | 270   | 0.86  | 2.76 | Large shallow    |
| Lake Washington         | USA            | 47.64  | -122.27 | 5      | 33    | 65.2  | 87.6  | 5.3   |      | Medium temperate |
| Windermere              | United Kingdom | 54.31  | -2.95   | 39     | 21.3  | 64    | 14.76 |       | 0.46 | Medium temperate |
| Lake Wingra             | USA            | 43.05  | -89.43  | 254    | 2.7   | 6.7   | 1.36  | 0.7   |      | Small temperate  |
| Zlutice Reservoir       | Czechia        | 50.09  | 13.11   | 507.95 | 8.5   | 24    | 1.5   | 2.8   |      | Medium temperate |
| Lake Zurich             | Switzerland    | 47.28  | 8.6     | 406    | 51    | 136   | 68.2  | 5.04  |      | Medium temperate |

Table S2: Characteristics of the lakes used for cluster analysis.

|                    |                                                                                       |                 |
|--------------------|---------------------------------------------------------------------------------------|-----------------|
| Reservoir.or.lake. | either lake or reservoir                                                              | -               |
| latitude.dec.deg   | coordinates of the lake latitude                                                      | °C              |
| longitude.dec.deg  | coordinates of the lake longitude                                                     | °C              |
| elevation.m        | elevation of the lake                                                                 | m               |
| mean.depth.m       | mean depth of the lake                                                                | m               |
| max.depth.m        | maximum depth of the lake                                                             | m               |
| lake.area.sqkm     | lake surface area                                                                     | km <sup>2</sup> |
| Duration           | number of years with observations                                                     | y               |
| months_meas        | number of unique months in which observations were available                          | -               |
| reldepth_median    | median relative depth of the observations (0 means surface, 1 means bottom)           | -               |
| months_median      | median month of the observations                                                      | -               |
| kw                 | Average calibrated light extinction factor                                            | m <sup>-1</sup> |
| vd                 | Volume development ( <a href="#">Håkanson, 1981</a> )                                 | -               |
| osgood             | Osgood index ( <a href="#">Osgood, 1988</a> )                                         | -               |
| tsurf              | average annual surface temperature for the period 1980 – 2000 from simulation         | °C              |
| min_tsurf          | average annual minimum surface temperature for the period 1980 – 2000 from simulation | °C              |
| tbot               | average annual surface bottom for the period 1980 – 2000 from simulation              | °C              |

Table S3: Median RMSE of the calibrated models and the percentage of calibrated fits lower than 2 °C

| model    | Median RMSE (°C) | Percentage under 2 °C |
|----------|------------------|-----------------------|
| FLake    | 1.91             | 56.2                  |
| GLM      | 1.42             | 83.6                  |
| GOTM     | 1.58             | 76.7                  |
| Simstrat | 1.40             | 80.8                  |

### S1.3 Additional simulations for GOTM and Simstrat

From the findings of the calibration runs and the discussion in the main text further questions came up and we decided to investigate some of the aspect in more detail by running an additional set of (restrained) calibrations for two of the models: GOTM and Simstrat. As these additional simulations confirmed the findings from the original calibration runs, but give further insight that might be valuable for some of the model users, we document the additional simulations here.

As we found and discuss in the main text the parameter  $k_{\min}$  was the most sensitive model parameter for GOTM. We ran another round of calibrations with the same settings, except that we kept  $k_{\min}$  at a constant value of  $10^{-8}$ , which is the default value. The reasoning behind these additional simulations were to check whether or not the larger values of  $k_{\min}$  are causing the different behavior of the wind speed and shortwave radiation scaling factors in GOTM (as discussed in the main text).

For Simstrat we ran an additional round of calibration with the same settings, except that we set  $a_{\text{seiche}}$  to 0. This disables the seiching module for Simstrat and we can therefore test if the better performance of Simstrat was caused by the inclusion of seiching as we speculated. In addition, disabling the seiching module allows us to better compare the impact of reducing  $k_{\min}$  (which also partially covers seiching).

#### S1.3.1 GOTM and $k_{\min}$

The range of  $k_{\min}$  used in this study was  $1.5 \cdot 10^{-7}$ – $1 \cdot 10^{-5}$ , which is rather large compared to the default value of  $1 \cdot 10^{-8}$  in the GOTM manual. In the literature typical values of  $1 \cdot 10^{-6}$  are reported for turbulent kinetic energy in the hypolimnion of lakes (e.g. [Wüest and Lorke, 2003](#)). When investigated in detail it can be seen that the calibrated  $k_{\min}$  values (from the original calibration as described in the main text) are larger for deep, medium temperate, and warm lakes compared to small temperate lakes (Figure S12, subpanel A). The exceptions are the large shallow lakes that cover a wide range of  $k_{\min}$  values. This could be explained by looking at the sensitivity of  $k_{\min}$  for the different clusters, whereas for the large shallow lakes  $k_{\min}$  has very low sensitivity values (see figure S12, subpanel B).

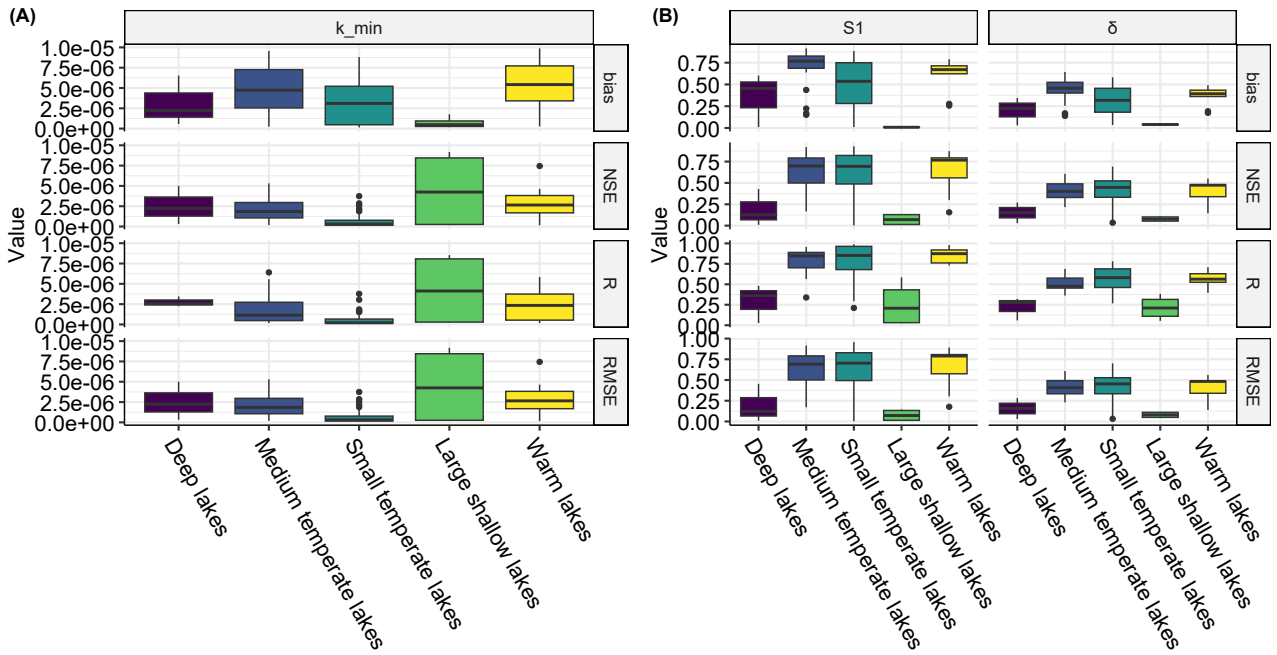

Figure S12: Boxplot of GOTMs  $k_{\min}$  values for the best performing parameter set for the different performance metrics and lake clusters (A). And Boxplot of the two sensitivity metrics for GOTMs  $k_{\min}$  along the different performance metrics and lake clusters (B).

### S1.3.2 Additional calibration round

Under these additional calibration rounds (GOTM with  $k_{\min} = 1 \cdot 10^{-8}$  and Simstrat with  $a_{\text{seiche}} = 0$ ) both of the models showed worse performance in most of the lakes, especially for the medium temperate and warm lakes. For large shallow lakes, very small differences were seen and for some of the small temperate lakes we even saw better performance for both Simstrat and GOTM (Figure S13).

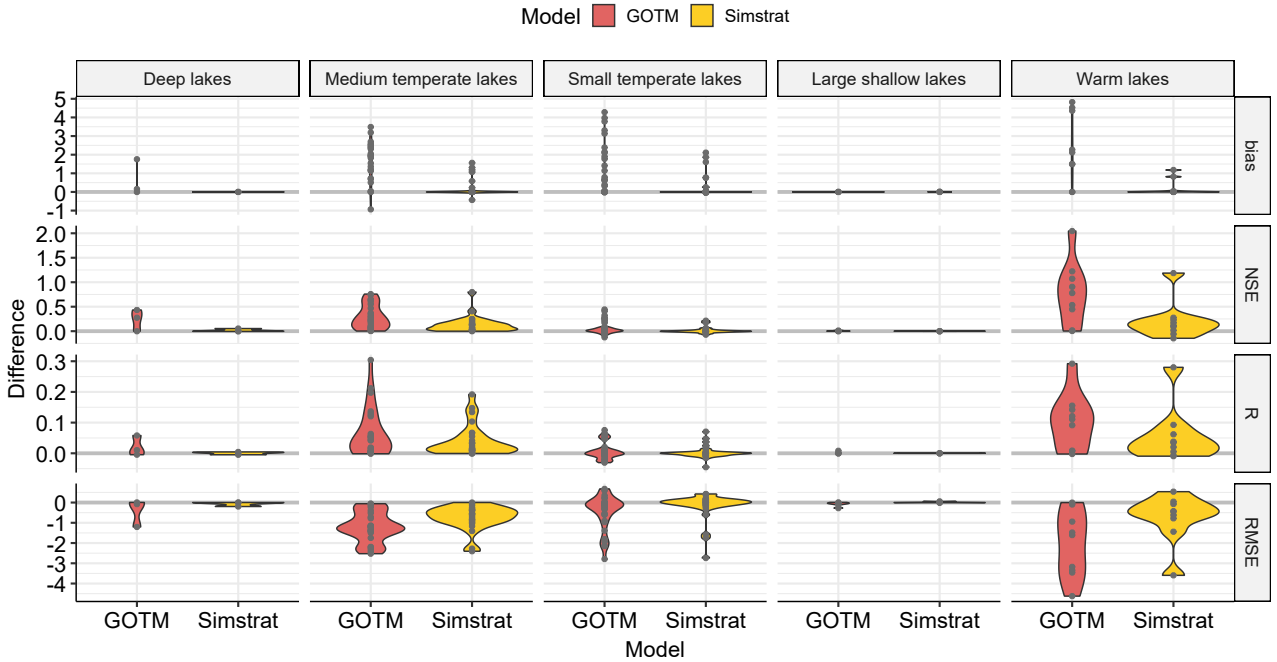

Figure S13: Difference between the performance metrics for the best performing parameter set for GOTM and Simstrat along the different performance metrics and lake clusters. The difference is calculated as original calibration minus new calibration. The new calibration rounds restricted the deep mixing by fixing GOTMs  $k_{\min}$  to  $10^{-8}$  and Simstrats  $a_{\text{seiche}}$  to 0.

However, with  $k_{\min}$  kept at  $1 \cdot 10^{-8}$  the calibrated wind speed scaling from GOTM (GOTM\_r in figure S14) increased but, was still often smaller than in the other models.

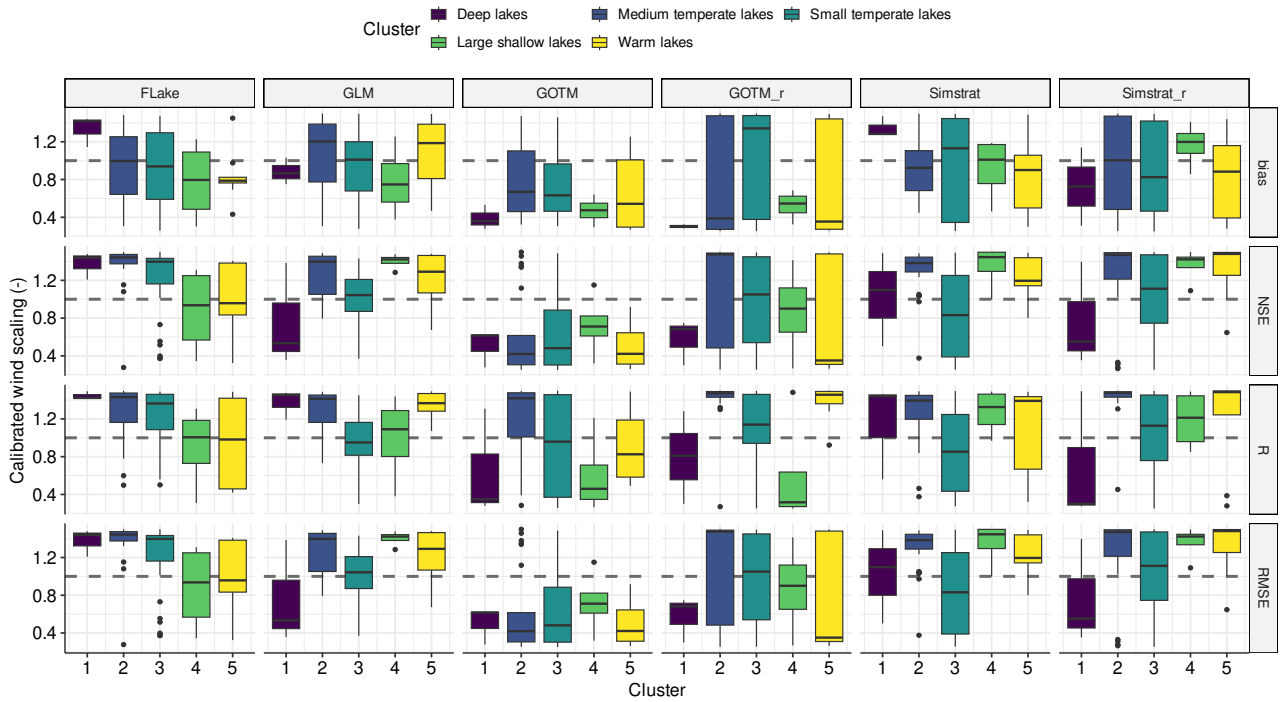

Figure S14: Boxplot of the wind speed scaling factors of the best performing parameter set for the different models, clusters and based on which performance metric was chosen to optimize. The two additional models GOTM\_r and Simstrat\_r denote the calibration rounds for GOTM and Simstrat with restricted the deep mixing (GOTM  $k_{\min} = 10^{-8}$  and Simstrats  $a_{\text{seiche}} = 0$ ).

For the calibrated shortwave radiation scaling we did not see a reduction in the values for the best performing parameter set for the new round of calibration (GOTM\_r in figure S15). The calibrated values even slightly increased when keeping  $k_{\min}$  at a constant value of  $1 \cdot 10^{-8}$ .

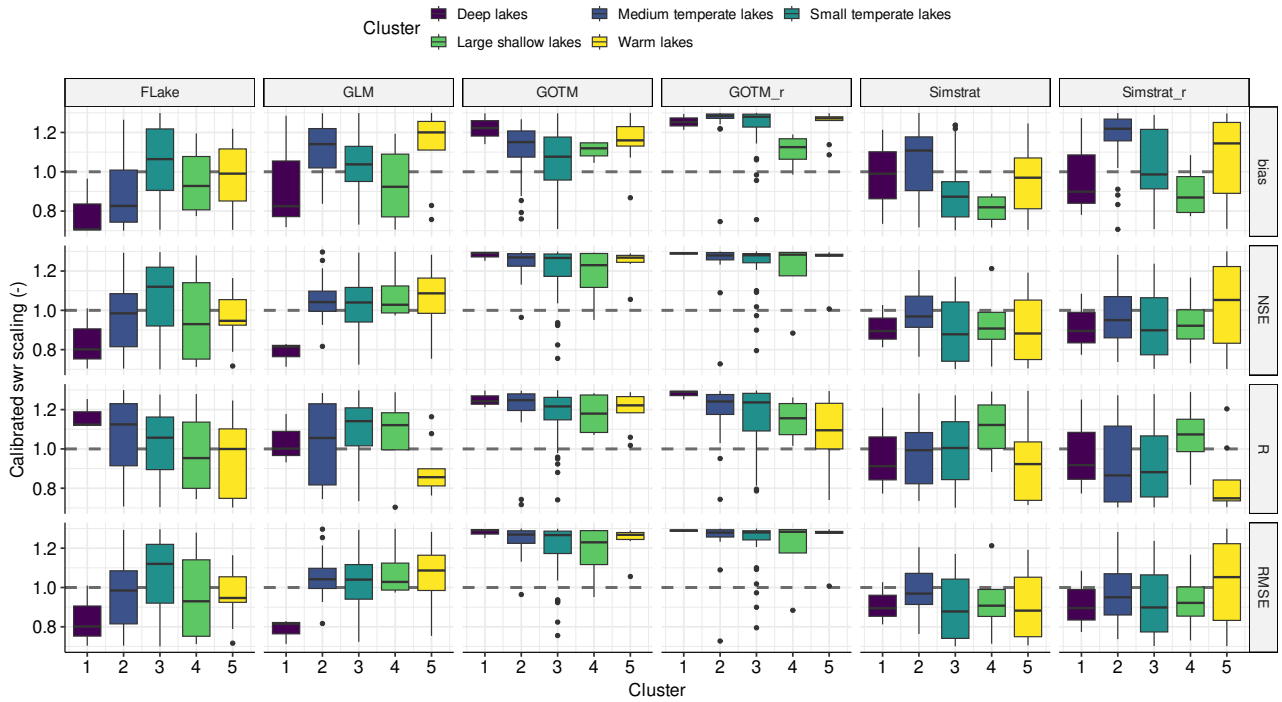

Figure S15: Boxplot of the shortwave radiation scaling factors of the best performing parameter set for the different models, clusters and based on which performance metric was chosen to optimize. The two additional models GOTM\_r and Simstrat\_r denote the calibration rounds for GOTM and Simstrat with restricted deep mixing (GOTM  $k_{\min} = 10^{-8}$  and Simstrats  $a_{\text{seiche}} = 0$ ).

Reducing  $k_{\min}$  reduced the overall model performance of GOTM for the lakes where intermediate and deep mixing (incl. internal oscillations) is of importance (as seen by the similar reduction in model performance of Simstrat when  $a_{\text{seiche}} = 0$ ). In GOTM, increasing wind speed scaling factor can (to some degree) compensate for this, but it is not able to perform nearly as well as with larger  $k_{\min}$  values. As GOTM cannot reach similar performance by increasing wind speed scaling and reducing shortwave radiation scaling, we suggest that there is potentially no strong interaction or correlation between the three parameters (as also seen by the sensitivity and interaction measure). Only for some of the small temperate lakes, a lower  $k_{\min}$  value (and  $a_{\text{seiche}} = 0$  for Simstrat) is resulting in better model performance. For the practical application of the two models this could be an important hint that for smaller lakes the lower end of the calibration range of these parameters should be sufficiently low.

An open question remained as to why the values for the calibrated wind speed and shortwave radiation scaling for GOTM behave so differently compared to the other lake models (Figure S14 and S15). This is especially unexpected for Simstrat, which is the most similar to GOTM in terms of process description and even showed a similar reaction in the additional calibration round (reduced  $k_{\min}$  and  $a_{\text{seiche}} = 0$ ) where we saw decreased performance in some of the lake clusters (Figure S13).

## References

- Håkanson, L.: A Manual of Lake Morphometry, Springer Berlin Heidelberg, Berlin, Heidelberg, <https://doi.org/10.1007/978-3-642-81563-8>, 1981.
- Osgood, R. A.: Lake mixis and internal phosphorus dynamics, Archiv für Hydrobiologie, pp. 629–638, <https://doi.org/10.1127/archiv-hydrobiol/113/1988/629>, publisher: Schweizerbart'sche Verlagsbuchhandlung, 1988.
- Wüest, A. and Lorke, A.: SMALL-SCALE HYDRODYNAMICS IN LAKES, Annual Review of Fluid Mechanics, 35, 373–412, <https://doi.org/10.1146/annurev.fluid.35.101101.161220>, publisher: Annual Reviews, 2003.
